# Supplementary material
Source: PubMed Central journal article supplement (PMC10288909)
Supplement: NIHMS1865711-supplement-MMC1.pdf [file NIHMS1865711-supplement-MMC1.pdf]

# THE LANCET HIV

## Supplementary appendix 1

This translation in French was submitted by the authors and we reproduce it as supplied. It has not been peer reviewed. *The Lancet's* editorial processes have only been applied to the original in English, which should serve as reference for this manuscript.

Cette traduction en français a été proposée par les auteurs et nous l'avons reproduite telle quelle. Elle n'a pas été examinée par des pairs. Les processus éditoriaux du *Lancet* n'ont été appliqués qu'à l'original en anglais et c'est cette version qui doit servir de référence pour ce manuscrit.

Supplement to: Lyons CE, Twahirwa Rwema JO, Makofane K, et al. Associations between punitive policies and legal barriers to consensual same-sex sexual acts and HIV among gay men and other men who have sex with men in sub-Saharan Africa: a multicountry, respondent-driven sampling survey. *Lancet HIV* 2023; published online Jan 6. [https://doi.org/10.1016/S2352-3018\(22\)00336-8](https://doi.org/10.1016/S2352-3018(22)00336-8).

## RÉSUMÉ

**Contexte :** Des évaluations limitées des facteurs du VIH au niveau structurel affectant les homosexuels et autres hommes ayant des rapports sexuels avec des hommes (HSH) ont été réalisées en particulier en Afrique subsaharienne. Notre objectif était d'examiner l'historique des tests de dépistage du VIH, le statut VIH et la stigmatisation chez les HSH vivant dans dix pays différents avec des environnements juridiques hétérogènes.

**Méthodes :** les HSH ont été recrutés entre 2011 et 2020 par échantillonnage piloté par les répondants au Burkina Faso, au Cameroun, en Côte d'Ivoire, en Gambie, en Guinée-Bissau, au Nigeria, au Sénégal, en eSwatini, au Rwanda et au Togo. Pour chaque pays, la politique relative aux comportements sexuels entre personnes de même sexe a été classée comme non criminalisée ou criminalisée. Les pays ont également été classés en fonction des rapports récents sur les poursuites judiciaires liées aux actes sexuels entre personnes de même sexe. Les obstacles juridiques ont été définis comme ceux qui empêchent légalement l'enregistrement ou le fonctionnement des organisations de la société civile (OSC) liées à l'orientation sexuelle. Les données individuelles sur les antécédents de dépistage du VIH, le statut VIH et la stigmatisation ont été recueillies par le biais de questionnaires sociocomportementaux administrés par des enquêteurs et des tests de dépistage du VIH. Une régression logistique multiniveaux à interceptions aléatoires a été utilisée pour évaluer l'association entre les politiques, les poursuites récentes, les obstacles juridiques aux OSC et les facteurs liés au VIH, avec des rapports de cotes ajustés (RCA) et des intervalles de confiance à 95 % (IC).

**Résultats :** Nous avons recruté 8049 MSM avec un âge médian de 23 ans. Parmi les participants, 60,7% vivent dans des pays qui criminalisent les actes sexuels entre personnes de même sexe. La prévalence du VIH parmi les HSH était plus élevée dans les milieux criminalisés (RCA:5-15 ; 95%IC:1-12,23-57) que dans les milieux non criminalisés ; plus élevée dans les milieux ayant fait l'objet de poursuites récentes (RCA:12-06 ; 95%IC:7-19,20-25) que dans les milieux sans poursuites ; et plus élevée dans les milieux présentant des obstacles aux OSC (aOR:9-83 ; 95%IC:2-00,48-30). Le dépistage du VIH ou la connaissance du statut n'étaient pas associés à des politiques ou pratiques punitives. La stigmatisation était associée à la séropositivité, mais ne variait pas de manière constante selon les environnements juridiques. Enfin, les disparités de prévalence du VIH entre les HSH et les autres hommes adultes étaient les plus élevées dans les environnements punitifs.

**Interprétation/Conclusion:** Les risques structurels, notamment les politiques discriminatoires au niveau national, les poursuites judiciaires et les obstacles juridiques peuvent contribuer à une prévalence plus élevée du VIH chez les hommes ayant des rapports sexuels avec des hommes. Prises dans leur ensemble, ces données soulignent l'importance de la décriminalisation et de la diminution de l'application des lois, ainsi que de la réduction de la stigmatisation comme éléments centraux d'une lutte efficace contre le VIH.
