# Supplementary material
Source: PubMed Central journal article supplement (PMC10288909)
Supplement: NIHMS1865711-supplement-MMC2.pdf [file NIHMS1865711-supplement-MMC2.pdf]

# THE LANCET HIV

## Supplementary appendix 2

This appendix formed part of the original submission and has been peer reviewed. We post it as supplied by the authors.

Supplement to: Lyons CE, Twahirwa Rwema JO, Makofane K, et al. Associations between punitive policies and legal barriers to consensual same-sex sexual acts and HIV among gay men and other men who have sex with men in sub-Saharan Africa: a multicountry, respondent-driven sampling survey. *Lancet HIV* 2023; published online Jan 6. [https://doi.org/10.1016/S2352-3018\(22\)00336-8](https://doi.org/10.1016/S2352-3018(22)00336-8).

## SUPPLEMENTARY TABLES

**Supplementary Table 1: Summary of data collection across 10 countries in sub-Saharan Africa**

| Country       | Recruitment dates             | Sample size by country | Number of recruitment seeds | Greatest recruitment chain length | Study site locations | Number of recruitment seeds by site | Sample size by site | Citation |
|---------------|-------------------------------|------------------------|-----------------------------|-----------------------------------|----------------------|-------------------------------------|---------------------|----------|
| Burkina Faso  | January – August 2013         | 672                    | 11                          | 24                                | Bobo Dioulasso       | 5                                   | 329                 | 1,2      |
|               |                               |                        |                             |                                   | Ouagadougou          | 6                                   | 343                 |          |
| Cameroon      | November 2015– October 2016   | 1323                   | 11                          | 14                                | Yaoundé              | 4                                   | 306                 | 2,4      |
|               |                               |                        |                             |                                   | Douala               | 1                                   | 354                 |          |
|               |                               |                        |                             |                                   | Bertoua              | 4                                   | 251                 |          |
|               |                               |                        |                             |                                   | Bamenda              | 1                                   | 208                 |          |
|               |                               |                        |                             |                                   | Kribi                | 1                                   | 204                 |          |
| Cote d'Ivoire | March – October 2015          | 1301                   | 16                          | 13                                | Abidjan              | 3                                   | 351                 | 2        |
|               |                               |                        |                             |                                   | Agboville            | 3                                   | 200                 |          |
|               |                               |                        |                             |                                   | Bouake               | 3                                   | 350                 |          |
|               |                               |                        |                             |                                   | Gagnoa               | 3                                   | 150                 |          |
|               |                               |                        |                             |                                   | Yamoussoukro         | 4                                   | 250                 |          |
| Eswatini      | August - October 2011         | 326                    | 5                           | 14                                | Manzini              | 5                                   | 326                 | 2,4      |
| Gambia        | May 2017– May 2018            | 114                    | 19                          | 11                                | Banjul               | 19                                  | 114                 |          |
| Guinea-Bissau | September 2017 – January 2018 | 451                    | 4                           | 10                                | Bafatá               | 1                                   | 60                  |          |
|               |                               |                        |                             |                                   | Bissau               | 1                                   | 280                 |          |
|               |                               |                        |                             |                                   | Bissorã              | 1                                   | 57                  |          |
|               |                               |                        |                             |                                   | Gabu                 | 1                                   | 54                  |          |
| Nigeria       | January 2015 – May 2020       | 1716                   | 109                         | 26                                | Abuja                | 109                                 | 1716                | 2        |
| Rwanda        | March 2018 - August 2018      | 737                    | 3                           | 12                                | Kigali               | 3                                   | 737                 | 5        |
| Senegal       | February – November 2015      | 724                    | 13                          | 15                                | Dakar                | 5                                   | 462                 | 2,6,7    |
|               |                               |                        |                             |                                   | Mbour                | 6                                   | 159                 |          |
|               |                               |                        |                             |                                   | Thies                | 2                                   | 103                 |          |
| Togo          | January – June 2013           | 683                    | 8                           | 10                                | Lomé                 | 4                                   | 354                 | 2,8,9    |
|               |                               |                        |                             |                                   | Kara                 | 4                                   | 329                 |          |

**Supplementary Table 2: Country specific ethics approvals and inclusion criteria**

| Country       | National Ethics committee                                           | Inclusion criteria: Age        |
|---------------|---------------------------------------------------------------------|--------------------------------|
| Burkina Faso  | Health Research Ethics Committee of Burkina Faso                    | ≥18 years                      |
| Cameroon      | National Ethics Committee of Cameroon                               | ≥18 years                      |
| Côte d'Ivoire | The Health Research Ethics Committee of Côte d'Ivoire               | ≥18 years                      |
| Guinea Bissau | National Research Ethics Committee of Guinea Bissau                 | ≥18 years                      |
| Senegal       | The Senegalese National Health Research Ethics                      | ≥18 years                      |
| Eswatini      | The Swaziland Scientific Ethics Committee                           | ≥18 years                      |
| The Gambia    | Scientific Coordination Committee in the Gambia                     | ≥18 years                      |
| Nigeria       | Nigerian Federal Capital Territory Health Research Ethics Committee | ≥16 years in the city of Abuja |
| Rwanda        | The Rwanda National Ethics committee                                | ≥18 years                      |
| Togo          | Ethical Committee of Togo.                                          | ≥18 years                      |

**Supplementary Table 3: Stigma Measures**

| Stigma                                  | Stigma Measure (yes/no response)                                                                                                                                                                                            |
|-----------------------------------------|-----------------------------------------------------------------------------------------------------------------------------------------------------------------------------------------------------------------------------|
| Stigma from family or friends           | Have you ever felt excluded from family activities because you have sex with men?                                                                                                                                           |
|                                         | Have you ever felt that family members have made discriminatory remarks or gossiped about you because you have sex with men?                                                                                                |
|                                         | Have you ever felt rejected by your friends because you have sex with men?                                                                                                                                                  |
| Anticipated/perceived healthcare stigma | Have you ever felt afraid to go to health care services because you worry someone may learn you have sex with men?                                                                                                          |
|                                         | Have you ever avoided going to health care services because you worry someone may learn you have sex with men?                                                                                                              |
| General social stigma                   | Have you ever felt that you were not treated well in a health center because someone knew that you have sex with men?                                                                                                       |
|                                         | Have you ever heard health care providers gossiping about you (talking about you) because you have sex with men?                                                                                                            |
|                                         | Have you ever felt that the police refused to protect you because you have sex with men?                                                                                                                                    |
|                                         | Have you ever felt scared to be in public places because you have sex with men?                                                                                                                                             |
|                                         | Have you ever been verbally harassed and felt it was because you have sex with men?                                                                                                                                         |
|                                         | Have you ever been blackmailed by someone because you have sex with men?                                                                                                                                                    |
|                                         | Has someone ever physically hurt you (pushed, shoved, slapped, hit, kicked, choked or otherwise physically hurt you)? Was this because you have sex with men?                                                               |
|                                         | Have you ever been forced to have sex when you did not want to? (By forced, I mean physically forced, coerced to have sex, or penetrated with an object, when you did not want to). Was this because you have sex with men? |

Stigma questions are categorized into 3 types of stigmas: Stigma from family or friends; anticipated/perceived healthcare stigma; General social stigma. If individuals reported 'yes' to one or more of the survey questions described in each of the responsive categories, then they were categorized as having experienced this respective type of stigma (Social stigma related to family and friends; Anticipated/perceived healthcare stigma; general social stigma).

**Supplementary Table 4: Legal environment categories and definitions**

| Legal environment                                                                                     | Categories                  | Definitions                                                                                                        | Source                                                                                  | Methodology                                 |
|-------------------------------------------------------------------------------------------------------|-----------------------------|--------------------------------------------------------------------------------------------------------------------|-----------------------------------------------------------------------------------------|---------------------------------------------|
| Policy related to same-sex sexual relationships, practices, and preferences                           | Criminalized                | Consensual same-sex sexual acts are criminalized under national law                                                | HIV Policy Lab* <sup>10</sup>                                                           | Full methodology described <sup>11</sup>    |
|                                                                                                       | Not criminalized            | Consensual same-sex acts are not criminalized under national law                                                   |                                                                                         |                                             |
| Prosecutions related to same-sex sexual relationships, practices, and preferences                     | Recent prosecutions         | There are reports of people being prosecuted for consensual same-sex sex acts in the previous 1 year***.           | HIV Policy Lab* <sup>10</sup>                                                           | Full methodology described <sup>11</sup>    |
|                                                                                                       | No recent prosecutions      | There are no reports of people being prosecuted for consensual same-sex sex acts in the previous 1 year***.        |                                                                                         |                                             |
| Legal barriers to the registration or operation of CSOs working on sexual and gender diversity issues | Legal barriers              | Confirmed legal barriers to the registration or operation of CSOs working on sexual and gender diversity issues    | International Lesbian, Gay, Bisexual, Trans and Intersex Association** <sup>12-19</sup> | Full methodology described <sup>12-19</sup> |
|                                                                                                       | No confirmed legal barriers | No confirmed legal barriers to the registration or operation of CSOs working on sexual and gender diversity issues |                                                                                         |                                             |

\* The HIV Policy Lab is a unique collaboration between academic, UN, and civil society organizations to track, measure and improve the HIV-related law and policy environment in countries around the world.

\*\* International Lesbian, Gay, Bisexual, Trans and Intersex Association (ILGA) supports LGBTI civil society worldwide through advocacy and research projects and give grassroots movements a voice within international organizations.

\*\*\*Adapted from original definition of HIV policy lab of last 3 years.

**Supplementary Table 5: Legal environment by country**

| Country       | Year of data collection | Policy related to same-sex sexual relationships, practices, and preferences |                   | Prosecutions related to same-sex sexual relationships, practices, and preferences |                    | Legal barriers to the registration or operation of sexual orientation related CSOs |
|---------------|-------------------------|-----------------------------------------------------------------------------|-------------------|-----------------------------------------------------------------------------------|--------------------|------------------------------------------------------------------------------------|
|               |                         | Year of data collection                                                     | Current status    | Year of data collection                                                           | Current status     | Current status****                                                                 |
| Burkina Faso  | 2013                    | Not criminalized**                                                          | Not criminalized* | No recent arrests***                                                              | No recent arrests* | Confirmed legal barriers**                                                         |
| Cameroon      | 2015–2016               | Criminalized*                                                               | Criminalized*     | Recent arrests*                                                                   | Recent arrests*    | Confirmed legal barriers**                                                         |
| Cote d'Ivoire | 2015                    | Not criminalized*                                                           | Not criminalized* | No recent arrests*                                                                | No recent arrests* | No confirmed legal barriers**                                                      |
| Eswatini      | 2011                    | Criminalized**                                                              | Criminalized*     | No recent arrests***                                                              | No recent arrests* | Confirmed legal barriers**                                                         |
| Gambia        | 2017–2018               | Criminalized*                                                               | Criminalized*     | Recent arrests*                                                                   | Recent arrests*    | No confirmed legal barriers**                                                      |
| Guinea Bissau | 2017 – 2018             | Not criminalized*                                                           | Not criminalized* | No recent arrests*                                                                | No recent arrests* | No confirmed legal barriers**                                                      |
| Nigeria       | 2015 – 2020             | Criminalized*                                                               | Criminalized*     | Recent arrests*                                                                   | Recent arrests*    | Confirmed legal barriers**                                                         |
| Rwanda        | 2018                    | Not criminalized*                                                           | Not criminalized* | No recent arrests*                                                                | No recent arrests* | No confirmed legal barriers**                                                      |
| Senegal       | 2015                    | Criminalized*                                                               | Criminalized*     | Recent arrests*                                                                   | Recent arrests*    | Confirmed legal barriers**                                                         |
| Togo          | 2013                    | Criminalized**                                                              | Criminalized*     | No recent arrests***                                                              | No recent arrests* | No confirmed legal barriers**                                                      |

\*Source: HIV Policy Lab database<sup>10,11</sup>

\*\*Source: ILGA State-Sponsored Homophobia Report.<sup>12-19</sup>

\*\*\*Source: Eswatini, Burkina Faso, Togo data collection took place in years that are not captured in the HIV Policy Lab Database. ILGA State-Sponsored Homophobia Reports were reviewed and did not report any prosecutions in these countries during these years. Online media was also reviewed to identify reports of prosecutions published in the online media. For each of these countries, no reports of arrests were identified. However, the process for identifying recent arrests was different from those identified in the HIV Policy Lab database and may be subject to error.

\*\*\*\* Defined for each country based on most recent ILGA State-Sponsored Homophobia Report (2020). Legal barriers to CSO was not systematically reported before 2017 and therefore all countries were categorized based on the 2020 report.

**Supplementary Table 6: HIV setting characteristics by country**

| Country       | Epidemic setting | HIV prevalence among adults 15-49* | HIV prevalence among men 15-49* | HIV prevalence difference (HIV prevalence among MSM** - HIV prevalence among men 15-49*) |
|---------------|------------------|------------------------------------|---------------------------------|------------------------------------------------------------------------------------------|
| Burkina Faso  | Concentrated     | 0.6                                | 0.5                             | 4.3                                                                                      |
| Cameroon      | Generalized      | 2.9                                | 1.8                             | 18.9                                                                                     |
| Cote d'Ivoire | Concentrated     | 1.9                                | 1.2                             | 10.4                                                                                     |
| Eswatini      | Generalized      | 27.9                               | 19.4                            | -2.4                                                                                     |
| Gambia        | Generalized      | 1.7                                | 1.3                             | 33.8                                                                                     |
| Guinea Bissau | Generalized      | 3.1                                | 2.2                             | 0.5                                                                                      |
| Nigeria       | Generalized      | 1.3                                | 0.9                             | 38.5                                                                                     |
| Rwanda        | Generalized      | 2.3                                | 1.7                             | 8.4                                                                                      |
| Senegal       | Concentrated     | 0.3                                | 0.3                             | 30                                                                                       |
| Togo          | Generalized      | 1.9                                | 1.9                             | 7.9                                                                                      |

\*UNAIDS estimates

\*\*HIV prevalence estimates is the based-on HIV testing among participants in the study.

**Supplementary Table 7: Correlation of structural barriers or legal environment**

|                                                                                                            | Policy related to same-sex sexual relationships, practices, and preferences* | Prosecutions related to same-sex sexual relationships, practices, and preferences within the last 3 years* | Legal barriers to the registration or operation of sexual orientation related CSOs** |
|------------------------------------------------------------------------------------------------------------|------------------------------------------------------------------------------|------------------------------------------------------------------------------------------------------------|--------------------------------------------------------------------------------------|
| Policy related to same-sex sexual relationships, practices, and preferences*                               | 1.00                                                                         | -                                                                                                          | -                                                                                    |
| Prosecutions related to same-sex sexual relationships, practices, and preferences within the last 3 years* | 0.7756                                                                       | 1.00                                                                                                       | -                                                                                    |
| Legal barriers to the registration or operation of sexual orientation related CSOs**                       | 0.6203                                                                       | 0.7434                                                                                                     | 1.00                                                                                 |

\*Defined for each country based on year of data collection.

\*\* Defined for each country based on year 2022.

**Supplementary Table 8: History of HIV testing, HIV status, and awareness of HIV status among MSM by country**

| Country       | Ever tested for HIV among all participants |           | Living with HIV |          | Ever told to be living with HIV among those living with HIV |         |
|---------------|--------------------------------------------|-----------|-----------------|----------|-------------------------------------------------------------|---------|
|               | %                                          | n/N       | %               | n/N      | %                                                           | n/N     |
| Burkina Faso  | 75.5                                       | 506/670   | 4.8             | 32/668   | 25.0                                                        | 8/32    |
| Cameroon      | 72.4                                       | 957/1322  | 20.7            | 272/1313 | 41.9                                                        | 114/272 |
| Cote d'Ivoire | 80.1                                       | 1042/1301 | 11.6            | 146/1261 | 32.9                                                        | 48/146  |
| Eswatini      | 54.3                                       | 177/326   | 17.0            | 55/234   | 27.3                                                        | 15/55   |
| Gambia        | 50.0                                       | 57/114    | 35.1            | 40/114   | 5.0                                                         | 2/40    |
| Guinea Bissau | 36.3                                       | 163/449   | 2.7             | 12/453   | 9.1                                                         | 1/11    |
| Nigeria       | 78.4                                       | 1339/1708 | 39.4            | 664/1686 | 53.8                                                        | 357/664 |
| Rwanda        | 90.8                                       | 668/736   | 10.1            | 74/736   | 60.8                                                        | 45/74   |
| Senegal       | 70.2                                       | 508/724   | 30.3            | 219/724  | 13.2                                                        | 29/219  |
| Togo          | 70.5                                       | 478/678   | 9.8             | 67/681   | 14.9                                                        | 10/67   |

**Supplementary Figure 1. Framework for legal environment, stigma, and HIV**

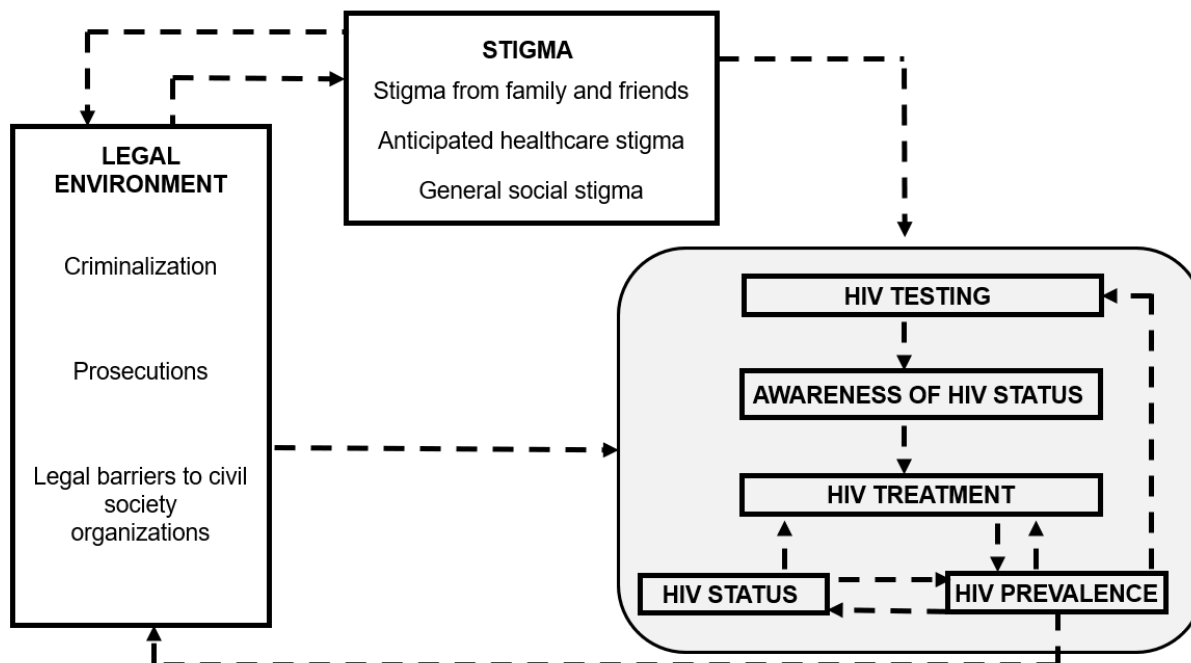

## REFERENCES

1. Baral SD, Stahlman S, Liestman B, et al. Characterizing the HIV risks and potential pathways to HIV infection among transgender women in Cote d'Ivoire, Togo and Burkina Faso. *JMIR public health and surveillance* 2016; **19**(3 Suppl 2): 20774.
2. Stahlman S ST, Sullivan PS, Ketende S, Lyons C, Charurat ME, Drame FM, Diouf D, Ezouatchi R, Kouanda S, Anato S, Mothopeng T, Mnisi Z, Baral SD. The Prevalence of Sexual Behavior Stigma Affecting Gay Men and Other Men Who Have Sex with Men Across Sub-Saharan Africa and in the United States. *JMIR public health and surveillance* 2016; **2**(2): e35.
3. Bowring AL, Ketende S, Rao A, et al. Characterising unmet HIV prevention and treatment needs among young female sex workers and young men who have sex with men in Cameroon: a cross-sectional analysis. *The Lancet Child & adolescent health* 2019; **3**(7): 482-91.
4. Rao A, Stahlman S. Sampling Key Populations for HIV Surveillance: Results From Eight Cross-Sectional Studies Using Respondent-Driven Sampling and Venue-Based Snowball Sampling. 2017; **3**(4): e72.
5. Twahirwa Rwema JO, Lyons CE, Herbst S, et al. HIV infection and engagement in HIV care cascade among men who have sex with men and transgender women in Kigali, Rwanda: a cross-sectional study. *Journal of the International AIDS Society* 2020; **23** Suppl 6(Suppl 6): e25604.
6. Lyons CE, Ketende S, Diouf D, et al. Potential Impact of Integrated Stigma Mitigation Interventions in Improving HIV/AIDS Service Delivery and Uptake for Key Populations in Senegal. *Journal of acquired immune deficiency syndromes (1999)* 2017; **74** Suppl 1: S52-s9.
7. Dibble KE, Baral SD, Beymer MR, et al. Stigma and healthcare access among men who have sex with men and transgender women who have sex with men in Senegal. *SAGE open medicine* 2022; **10**: 20503121211069276.
8. Ruiseñor-Escudero H, Lyons C, Ketende S, et al. Consistent Condom Use Among Men Who Have Sex With Men in Lomé and Kara, Togo. *AIDS research and human retroviruses* 2019; **35**(6): 519-28.
9. Ruiseñor-Escudero H, Lyons C, Ketende S, et al. Prevalence and factors associated to disclosure of same-sex practices to family members and health care workers among men who have sex with men in Togo. *AIDS care* 2019; **31**(8): 1019-25.
10. HIV Policy Lab. <https://www.hivpolicylab.org/>.
11. Kavanagh MM, Graeden E, Pillinger M, et al. Understanding and comparing HIV-related law and policy environments: cross-national data and accountability for the global AIDS response. *BMJ Glob Health* 2020; **5**(9).
12. State Sponsored Homophobia 2014: A world survey of sexual orientation laws: criminalisation, protection and recognition. Geneva: International Lesbian, Gay, Bisexual, Trans and Intersex Association, 2014.
13. State Sponsored Homophobia 2017: A world survey of sexual orientation laws: criminalisation, protection and recognition. Geneva: International Lesbian, Gay, Bisexual, Trans and Intersex Association, 2017.
14. State Sponsored Homophobia 2016: A world survey of sexual orientation laws: criminalisation, protection and recognition. Geneva: International Lesbian, Gay, Bisexual, Trans and Intersex Association, 2016.
15. State Sponsored Homophobia 2015: A world survey of sexual orientation laws: criminalisation, protection and recognition. Geneva: International Lesbian, Gay, Bisexual, Trans and Intersex Association, 2015.
16. State Sponsored Homophobia 2014: A world survey of laws criminalizing same-sex sexual acts between consenting adults Geneva: International Lesbian, Gay, Bisexual, Trans and Intersex Association, 2012.
17. State Sponsored Homophobia 2013: A world survey of sexual orientation laws: criminalisation, protection and recognition. Geneva: International Lesbian, Gay, Bisexual, Trans and Intersex Association, 2013.
18. State Sponsored Homophobia 2011: A world survey of laws criminalizing same-sex sexual acts between consenting adults Geneva: International Lesbian, Gay, Bisexual, Trans and Intersex Association, 2011.
19. State Sponsored Homophobia Geneva: International Lesbian, Gay, Bisexual, Trans and Intersex Association, 2019.
